# Supplementary material for: Implementation of Outcome-based Quality Improvement in Dutch Inflammatory Bowel Disease Centres
Source: Research Square preprint supplement (doi:10.21203/rs.3.rs-7592106/v1), 2025-09-23
Supplement: Supplementary file 1 [file 2ac81fa581f4070bf84ef0b3.xlsx]

## Sheet: Sheet1
	Deductively developed segments		Inductively developed themes
	Domain		Theme	Sub-theme
	Operationalizing outcome monitoring in practice		Discussing outcomes with peers	Without or occasional aggregate data
				Purpose of meetings not always outcome monitoring
				Evaluation of data and improvement initiatives emerging via discussions in MDT meetings
			External influence on outcomes selection & initiatives	External influence (other hospitals, national, regional initiatives, patient feedback)
				Influence from management, pharmacist
			Challenges related to evaluating care performance	Lack of guidance and clarity on good vs suboptimal care
				Benchmarking as a tool to evaluate care
				Lags in data also impact timely evaluations
				Effect of implemented intervention
	Organizational barriers & facilitators		Challenges in data infrastructure	Fragmented and mixed data collection methods
				Unstandardized data registration hampers hospital comparisons
			Staffing & role clarity	Lack of clarity of presence or roles of dedicated staff
				Unclear expectations related to time
				Limited role of management
				Lack of formalization of roles
			Leadership and professional engagement	Involvement of department manager/ management
				Strategic prioritization of outcomes-based care
			Usability of dashboards to support monitoring	Dashboard used for monitoring outcomes and tracking improvements
			Settings of hospital	Academic hospitals have extra help
				Certain hospitals are provided specialists to implement outcomes
	Motivation to implement outcome-based monitoring		Perceived benfits of outcome-monitoring	Monitoring lets you see objective feedback
				Monitoring lets you evaluate and implement systemic changes
			Motivation related to resources	Monitoring and administrative load for doctors
			Importance of motivated individuals	Personal attitudes play a role
				Reliance on specific people rather than roles
				Involvement and awareness of different collaboratives related to monitoring
