# Supplementary material for: Implementation of Outcome-based Quality Improvement in Dutch Inflammatory Bowel Disease Centres
Source: Research Square preprint supplement (doi:10.21203/rs.3.rs-7592106/v1), 2025-09-23
Supplement: Supplementary file 2 [file ebeb0002476c7a6167dfa3a4.docx]

**Evaluation of organizational and healthcare provider level readiness in Dutch IBD centres for outcome-based quality improvement cycles**

**Date: _______________**

**Interviewee Name: ______________________**

**Name of hospital in which the IBD team operates_____________________**

**Goals of this project:** As you may remember that the goals of this project are to evaluate the readiness for outcome-based quality improvement cycles in Dutch IBD centres. We aim to investigate how health care outcomes such as process measures, outcome measures are used for tracking and improvement of delivery of care. Additionally, we want to investigate facilitators and barriers of successful implementation of outcome-based quality improvement cycles.

This interview will take 1 hour in which I will ask you follow-up questions to the ones that you answered in the survey you completed earlier. The survey was based on 4 different domains through which we operationalize as important factors associated with readiness for outcome-based quality improvement. These include

**Table. Interview guide for assessing readiness for implementing outcomes-based QI in IBD care facilities.**

| **Improving outcomes as a strategy to implement QI** |
| --- |
| Monitoring of Outcomes |
| **For centres not monitoring outcomes at all or only yearly**:   - Is there a more informal way of monitoring and collecting outcomes within your IBD team? - If yes, how frequently? What kind of outcomes do you monitor? Explain the choice - Briefly explain the main barriers to monitoring outcomes on the regular basis? - Why is it not a formal setup in your IBD team?   Centres that monitor outcomes:   - Could you briefly explain the set up/ format of monitoring or discussing outcomes in your team? - In the survey you mentioned the following reasons, is this all or are there other reasons to select outcomes? - Do these outcomes change? - Is there a formal criterion to select and reselect these outcomes? - Who or what department initiates monitoring of outcomes? (Is it more developed in one department than the other such as surgery etc.) - What other external factors influence the choice of monitoring these outcomes (such as partnership with other hospitals, national/ regional registries already collect data/ government policies) |
| Identification and Selection of Improvement Potential |
| **For centres that indicate that monitoring of outcomes does not lead to improvement initiatives**   - You indicated that monitoring of outcomes does not lead to improvement initiatives, what are the reasons for that? What are the main barriers? - Is there a more informal way of selecting and implementing improvement initiatives? - If yes, can you give some examples of these monitoring initiatives? Did they result from monitoring of outcomes?   **For centres that implement improvement initiatives:**   - Can you give examples of improvement initiatives resulting from monitoring recently. - Is this evaluation part of formal performance assessment in your hospital? - If yes, how do you evaluate these initiatives. These can be done either linking to outcomes or evaluating whether they have been implemented in your team? |
| **Organizational resources** |
| Data Infrastructure |
| **For centres that didn’t answer this domain**   - Is the current data infrastructure according to you equipped to monitor outcomes properly and regularly? Why and why not - What are the main resources that are missing according to you? |
| Strategy |
| - Is quality improvement part of key elements defined in your hospital’s strategy or policy document? |
| Governance and leadership |
| - You mentioned in the survey that the following professionals (give examples from answers) are involved in discussions regarding outcome-based quality improvement, can you briefly explain their actual role in this? - You mentioned that the following professionals/ stakeholders take lead in these discussions, can you briefly say how are these people involved? What are the drivers according to your opinion |
| Staff |
| - How is having/ not having dedicated staff for outcomes-based QI helped in monitoring of outcomes? - Do you have dedicated data manager? Can you explain their role? - Do you have dedicated quality improvement team and can you explain their role? |
| **Attitudes of healthcare professionals towards QI** |
| - Why or why not do you think that monitoring of outcomes has or doesn’t have potential for QI? - Why do you think the current goals are achievable or not achievable? - In the survey you answered to the question about the people outcome-based monitoring benefits? Can you give an example on that? |
| **Other external factors** |
| - How does the broader healthcare environment (e.g., policies, regulations) influence your center's approach to quality improvement? |
